# Supplementary material for: Liver Fibrosis Biomarkers Accurately Exclude Advanced Fibrosis and Are Associated with Higher Cardiovascular Risk Scores in Patients with NAFLD or Viral Chronic Liver Disease
Source: PubMed Central journal article supplement (PMC7827076; doi:10.3390/diagnostics11010098), 2021-01-09
Supplement: diagnostics-11-00098-s001.pdf [file diagnostics-11-00098-s001.pdf]

## **Supplementary material**

**Liver fibrosis biomarkers accurately exclude advanced fibrosis and are associated with higher cardiovascular risk scores in patients with NAFLD or viral chronic liver disease.**

Stefano Ballestri, Alessandro Mantovani, Enrica Baldelli, Simonetta Lugari, Mauro Maurantonio, Fabio Nascimbeni, Alessandra Marrazzo, Dante Romagnoli, Giovanni Targher, Amedeo Lonardo.

## **Index**

**A. Supplementary Tables** **page 2-9**

**B. Supplementary Figures** **page 10-12**

## A. Supplementary Tables.

**Table S1. Characteristics of patients with absent-mild vs. significant liver fibrosis in the whole population.**

| Characteristics                                     | Absent-mild fibrosis (n=180) | Significant fibrosis (n=100) | P                |
|-----------------------------------------------------|------------------------------|------------------------------|------------------|
| <b><i>Biometrics</i></b>                            |                              |                              |                  |
| Age (years)                                         | 46.2±11.4                    | 50.3±11.4                    | <b>0.004</b>     |
| M/F ratio (n, %)                                    | 111/69 (62/38)               | 74/26 (74/26)                | <b>0.048</b>     |
| BMI (kg/m <sup>2</sup> )                            | 27.0±4.5                     | 28.2±4.4                     | <b>0.041</b>     |
| WC (cm)                                             | 95.1±11.7                    | 100.0±12.6                   | <b>0.009</b>     |
| Hypertension (n, %)                                 | 47 (26)                      | 35 (35)                      | 0.131            |
| Type 2 diabetes (n, %)                              | 21 (12)                      | 25 (25)                      | <b>0.007</b>     |
| MetS (n, %)                                         | 43 (24)                      | 34 (34)                      | 0.093            |
| <b><i>CVR scores</i></b>                            |                              |                              |                  |
| SCORE                                               | 0.3 (0.1÷1.2)                | 0.9 (0.2÷1.8)                | <b>&lt;0.001</b> |
| FRS                                                 | 6.4 (3.2÷12.5)               | 10.1 (4.9÷18.0)              | <b>&lt;0.001</b> |
| Progetto CUORE                                      | 1.7 (0.7÷4.1)                | 2.8 (1.1÷6.3)                | <b>0.003</b>     |
| <b><i>Laboratory</i></b>                            |                              |                              |                  |
| Platelet count (x10 <sup>3</sup> /mm <sup>3</sup> ) | 224.2±56.2                   | 191.8±64.9                   | <b>&lt;0.001</b> |
| Fasting glucose (mg/dL)                             | 93.0 (85.0÷100.0)            | 97.5 (92.3÷115.8)            | <b>&lt;0.001</b> |
| Fasting insulin (mIU/L)                             | 10.0 (7.1÷14.8)              | 12.2 (8.1÷17.0)              | 0.086            |
| HOMA-IR score                                       | 2.4 (1.5÷3.7)                | 3.1 (2.0÷4.8)                | <b>0.017</b>     |
| AST (U/L)                                           | 34.8 (26.4÷51.0)             | 50.0 (36.3÷70.5)             | <b>&lt;0.001</b> |
| ALT (U/L)                                           | 56.0 (37.3÷90.8)             | 91.0 (55.0÷134.2)            | <b>&lt;0.001</b> |
| GGT (U/L)                                           | 38.8 (22.0÷60.8)             | 55.0 (36.0÷104.0)            | <b>&lt;0.001</b> |
| Albumin (g/dL)                                      | 4.4±0.4                      | 4.3±0.5                      | <b>0.024</b>     |
| γ-globulin (mg/dL)                                  | 1.2±0.3                      | 1.3±0.5                      | 0.180            |
| TC (mg/dL)                                          | 189.6±43.0                   | 181.5±47.7                   | 0.150            |
| HDL-C (mg/dL)                                       | 47.2±13.6                    | 45.2±14.4                    | 0.329            |
| LDL-C (mg/dL)                                       | 122.4±38.7                   | 113.4±40.3                   | 0.116            |
| TG (mg/dL)                                          | 93.0 (71.3÷135.8)            | 113.0 (68.0÷168.0)           | 0.158            |
| SUA (mg/dL)                                         | 5.2±1.4                      | 5.4±1.5                      | 0.361            |
| Ferritin (mg/dL)                                    | 121.5 (62.8÷232.0)           | 193.0 (111.0÷297.0)          | <b>0.001</b>     |
| <b><i>Liver fibrosis biomarkers</i></b>             |                              |                              |                  |
| AAR                                                 | 0.63 (0.51÷0.74)             | 0.55 (0.46÷0.72)             | 0.088            |
| APRI                                                | 0.50 (0.31÷0.73)             | 0.71 (0.47÷1.39)             | <b>&lt;0.001</b> |
| FIB-4                                               | 0.93 (0.69÷1.44)             | 1.37 (0.84÷2.57)             | <b>&lt;0.001</b> |
| Forns                                               | 4.4±1.4                      | 5.7±2.1                      | <b>&lt;0.001</b> |

Data are expressed as means (±SD) for continuous variables normally distributed or as medians (25th–75th percentile) for those not normally distributed, and as frequencies (percentages) for categorical variables.

**Abbreviations:** AAR, AST to ALT ratio; ALT, alanine aminotransferase; APRI, AST to Platelet Ratio Index; AST, aspartate aminotransferase; BMI, body mass index; CVR, cardiovascular risk; F, female; FIB-4, fibrosis-4; FRS, Framingham risk score; GGT, gamma-glutamyl transferase; HDL-C, high density lipoprotein cholesterol; HOMA-IR, homeostasis model assessment of insulin resistance; LDL-C, low density lipoprotein cholesterol; M, male; MetS, metabolic syndrome; SUA, serum uric acid; TC, total cholesterol; TG, triglycerides; WC, waist circumference.

**Table S2. Characteristics of patients with absent-mild vs. significant liver fibrosis according to CLD aetiology.**

| Characteristics                                | Viral CLD                    |                             |              | NAFLD                       |                             |              |
|------------------------------------------------|------------------------------|-----------------------------|--------------|-----------------------------|-----------------------------|--------------|
|                                                | Absent-mild fibrosis (n=118) | Significant Fibrosis (n=55) | P            | Absent-mild fibrosis (n=62) | Significant Fibrosis (n=45) | P            |
| <b>Biometrics</b>                              |                              |                             |              |                             |                             |              |
| Age (years)                                    | 45.7±11.1                    | 51.8±10.7                   | <0.001       | 47.0±11.9                   | 48.47±12.1                  | 0.533        |
| M/F ratio (n, %)                               | 70/48 (59/41)                | 38/17 (69/31)               | 0.241        | 41/21 (66/34)               | 36/9 (80/20)                | 0.132        |
| BMI (kg/m <sup>2</sup> )                       | 25.9±4.2                     | 26.2±3.1                    | 0.646        | 28.9±4.4                    | 30.4±4.5                    | 0.077        |
| WC (cm)                                        | 90.0±10.4                    | 92.7±9.0                    | 0.260        | 99.5±11.1                   | 104.7±12.4                  | <b>0.028</b> |
| Hypertension (n, %)                            | 27 (23)                      | 17 (31)                     | 0.261        | 20 (32)                     | 18 (40)                     | 0.422        |
| Type 2 diabetes (n, %)                         | 6 (5)                        | 7 (13)                      | 0.118        | 15 (24)                     | 18 (40)                     | 0.093        |
| MetS (n, %)                                    | 15 (13)                      | 6 (11)                      | 0.808        | 28 (45)                     | 28 (62)                     | 0.116        |
| <b>CVR scores</b>                              |                              |                             |              |                             |                             |              |
| SCORE                                          | 0.3 (0.1÷1.1)                | 0.8 (0.3÷1.6)               | <b>0.003</b> | 0.5 (0.2÷1.2)               | 1 (0.2÷2.2)                 | 0.180        |
| FRS                                            | 6.2 (3.0÷12.5)               | 9.2 (4.8÷16.0)              | <b>0.013</b> | 6.9 (3.5÷13.3)              | 11.4 (5.4÷26.7)             | <b>0.024</b> |
| Progetto CUORE                                 | 1.3 (0.5÷4.0)                | 1.9 (0.9÷4.2)               | 0.119        | 2 (0.9÷4.2)                 | 4.3 (1.8÷8.8)               | <b>0.018</b> |
| <b>Laboratory</b>                              |                              |                             |              |                             |                             |              |
| Platelets (x10 <sup>3</sup> /mm <sup>3</sup> ) | 220.0±56.9                   | 176.4±60.5                  | <0.001       | 232.0±54.7                  | 210.6±65.7                  | <b>0.069</b> |
| Glucose (mg/dL)                                | 92.0 (84.0÷99.0)             | 97.0 (89.0÷104.0)           | <b>0.009</b> | 96.0 (88.0÷105.5)           | 101.0 (94.0÷123.0)          | <b>0.045</b> |
| Insulin (mIU/L)                                | 9.6 (7.1÷15.5)               | 9.4 (6.7÷16.0)              | 0.922        | 10.3 (6.8÷13.1)             | 14.0 (8.5÷17.9)             | <b>0.024</b> |
| HOMA-IR score                                  | 2.4 (1.5÷3.6)                | 2.5 (1.5÷4.4)               | 0.367        | 2.5 (1.5÷3.7)               | 3.4 (2.2÷5.6)               | <b>0.016</b> |
| AST (U/L)                                      | 39.2 (29.0÷57.5)             | 61.0 (38.0÷88.0)            | <0.001       | 28.0 (24.0÷40.0)            | 42.0 (29.0÷54.5)            | <0.001       |
| ALT (U/L)                                      | 60.5 (39.8÷105.5)            | 107.1 (55.5÷154.8)          | <b>0.001</b> | 47.0 (35.0÷71.5)            | 75.0 (53.5÷109.5)           | <b>0.001</b> |
| GGT (U/L)                                      | 36.0 (20.0÷48.7)             | 55.0 (37.0÷89.0)            | <0.001       | 48.5 (30.3÷100.5)           | 54.0 (35.0÷112.5)           | 0.333        |
| Albumin (g/dL)                                 | 4.4±0.4                      | 4.2±0.5                     | <b>0.005</b> | 4.5±0.5                     | 4.4±0.4                     | 0.545        |
| γ-globulin (mg/dL)                             | 1.31±0.33                    | 1.50±0.45                   | <b>0.003</b> | 1.07±0.21                   | 1.06±0.31                   | 0.987        |
| TC (mg/dL)                                     | 175.8±37.0                   | 163.1±37.8                  | <b>0.038</b> | 215.7±41.6                  | 204.0±49.2                  | 0.187        |
| HDL-C (mg/dL)                                  | 46.9±13.8                    | 50.8±14.7                   | 0.177        | 47.5±13.5                   | 40.6±12.5                   | <b>0.010</b> |
| LDL-C (mg/dL)                                  | 105.3±30.3                   | 96.9±36.0                   | 0.226        | 141.8±38.3                  | 126.8±39.1                  | 0.058        |
| TG (mg/dL)                                     | 83.0 (62.0÷112.0)            | 81.0 (61.0÷113.0)           | 0.773        | 132.0 (89.0÷206.0)          | 165.0 (117.5÷238.5)         | 0.103        |
| SUA (mg/dL)                                    | 4.8±1.2                      | 4.8±1.2                     | 0.978        | 6.0±1.5                     | 6.1±1.5                     | 0.850        |
| Ferritin (mg/dL)                               | 111.5 (57.0÷227.8)           | 176.0 (84.0÷265.0)          | <b>0.021</b> | 144.5 (83.8÷241.0)          | 210.5 (121.0÷359.0)         | <b>0.015</b> |
| <b>Liver fibrosis biomarkers</b>               |                              |                             |              |                             |                             |              |
| AAR                                            | 0.65 (0.53÷0.75)             | 0.64 (0.50÷0.73)            | 0.625        | 0.59 (0.48÷0.69)            | 0.49 (0.42÷0.68)            | 0.054        |
| APRI                                           | 0.55 (0.35÷0.85)             | 1.11 (0.60÷1.68)            | <0.001       | 0.38 (0.27÷0.54)            | 0.61 (0.38÷0.81)            | <b>0.001</b> |
| Fib4                                           | 1.04 (0.74÷1.56)             | 1.93 (1.05÷3.05)            | <0.001       | 0.76 (0.63÷1.09)            | 1.03 (0.64÷1.73)            | 0.059        |
| Forns                                          | 4.5±1.4                      | 6.3±1.9                     | <0.001       | 4.2±1.4                     | 5.0±2.1                     | <b>0.026</b> |
| NFS                                            |                              |                             |              | -2.05±1.29                  | -1.35±2.01                  | <b>0.045</b> |
| BARD                                           |                              |                             |              | 1 (0÷2)                     | 1 (0÷2)                     | 0.208        |
| HFS                                            |                              |                             |              | 0.04 (0.01÷0.07)            | 0.06 (0.02÷0.20)            | <b>0.026</b> |

Data are expressed as means (±SD) for continuous variables normally distributed or as medians (25th–75th percentile) for those not normally distributed, and as frequencies (percentages) for categorical variables.

**Abbreviations:** AAR, AST to ALT ratio; ALT, alanine aminotransferase; APRI, AST to Platelet Ratio Index; AST, aspartate aminotransferase; BARD, BMI AAR Diabetes; BMI, body mass index; CVR, cardiovascular risk; F, female; FIB-4, fibrosis-4; FRS, Framingham risk score; GGT, gamma-glutamyl transferase; HDL-C, high density lipoprotein cholesterol; HFS, Hepamet fibrosis score; HOMA-IR, homeostasis model assessment of insulin resistance; LDL-C, low density lipoprotein cholesterol; M, male; MetS, metabolic syndrome; NFS, NAFLD fibrosis score; SUA, serum uric acid; TC, total cholesterol; TG, triglycerides; WC, waist circumference.

**Table S3. Characteristics of patients with absent-to-moderate vs. advanced liver fibrosis in the whole population.**

| <b>Characteristics</b>                         | <b>Absent to moderate fibrosis (n=242)</b> | <b>Advanced Fibrosis (n=38)</b> | <b>P</b>     |
|------------------------------------------------|--------------------------------------------|---------------------------------|--------------|
| <b><i>Biometrics</i></b>                       |                                            |                                 |              |
| Age (years)                                    | 46.3±11.5                                  | 56.0±8.0                        | <0.001       |
| M/F ratio (n, %)                               | 159/83 (66/34)                             | 26/12 (68/32)                   | 0.854        |
| BMI (kg/m <sup>2</sup> )                       | 27.3±4.4                                   | 28.7±5.0                        | 0.069        |
| WC (cm)                                        | 96.4±11.3                                  | 101.4±16.9                      | 0.158        |
| Hypertension (n, %)                            | 63 (26)                                    | 19 (50)                         | <b>0.004</b> |
| Diabetes (n, %)                                | 30 (12)                                    | 16 (42)                         | <0.001       |
| MetS (n, %)                                    | 63 (26)                                    | 14 (38)                         | 0.175        |
| <b><i>CVR scores</i></b>                       |                                            |                                 |              |
| SCORE                                          | 0.4 (0.1÷1.3)                              | 1.3 (0.8÷3.0)                   | <0.001       |
| FRS                                            | 6.7 (3.2÷12.9)                             | 15.7 (8.9÷27.8)                 | <0.001       |
| Progetto CUORE                                 | 1.8 (0.8÷4.2)                              | 5.7 (2.5÷12.2)                  | <0.001       |
| <b><i>Laboratory</i></b>                       |                                            |                                 |              |
| Platelets (x10 <sup>3</sup> /mm <sup>3</sup> ) | 221.9±55.8                                 | 153.2±62.6                      | <0.001       |
| Glucose (mg/dL)                                | 94.0 (86.0÷101.0)                          | 99.0 (92.5÷139.5)               | <b>0.002</b> |
| Insulin (mIU/L)                                | 10.6 (7.1÷15.7)                            | 10.7 (7.8÷19.4)                 | 0.516        |
| HOMA-IR score                                  | 2.5 (1.6÷3.8)                              | 3.2 (2.0÷6.9)                   | 0.075        |
| AST (U/L)                                      | 37.0 (27.7÷53.3)                           | 62.8 (46.5÷82.1)                | <0.001       |
| ALT (U/L)                                      | 61.0 (40.8÷107.3)                          | 93.0 (55.9÷143.3)               | <b>0.004</b> |
| GGT (U/L)                                      | 40.0 (25.5÷66.5)                           | 71.5 (47.8÷141.3)               | <0.001       |
| Albumin (g/dL)                                 | 4.4±0.4                                    | 4.2±0.4                         | <b>0.001</b> |
| γ-globulin (mg/dL)                             | 1.2±0.4                                    | 1.4±0.5                         | 0.086        |
| TC (mg/dL)                                     | 189.8±45.2                                 | 166.7±36.6                      | <b>0.003</b> |
| HDL-C (mg/dL)                                  | 46.4±14.0                                  | 46.3±14.1                       | 0.976        |
| LDL-C (mg/dL)                                  | 120.9±39.8                                 | 103.6±34.8                      | <b>0.049</b> |
| TG (mg/dL)                                     | 95.0 (69.0÷148.0)                          | 115.0 (75.5÷145.3)              | 0.402        |
| SUA (mg/dL)                                    | 5.3±1.4                                    | 5.1±1.4                         | 0.540        |
| Ferritin (mg/dL)                               | 144.5 (75.3÷245.8)                         | 184.0 (92.0÷378.0)              | 0.070        |
| <b><i>Liver fibrosis biomarkers</i></b>        |                                            |                                 |              |
| AAR                                            | 0.61 (0.48÷0.72)                           | 0.67 (0.52÷0.85)                | <b>0.042</b> |
| APRI                                           | 0.51 (0.32÷0.74)                           | 1.26 (0.76÷1.75)                | <0.001       |
| FIB-4                                          | 0.96 (0.69÷1.46)                           | 2.53 (1.73÷3.59)                | <0.001       |
| Forns                                          | 4.5±1.5                                    | 7.3±1.6                         | <0.001       |

Data are expressed as means (±SD) for continuous variables normally distributed or as medians (25th–75th percentile) for those not normally distributed, and as frequencies (percentages) for categorical variables.

**Abbreviations:** AAR, AST to ALT ratio; ALT, alanine aminotransferase; APRI, AST to Platelet Ratio Index; AST, aspartate aminotransferase; BMI, body mass index; CVR, cardiovascular risk; F, female; FIB-4, fibrosis-4; FRS, Framingham risk score; GGT, gamma-glutamyl transferase; HDL-C, high density lipoprotein cholesterol; HOMA-IR, homeostasis model assessment of insulin resistance; LDL-C, low density lipoprotein cholesterol; M, male; MetS, metabolic syndrome; SUA, serum uric acid; TC, total cholesterol; TG, triglycerides; WC, waist circumference.

**Table S4. Characteristics of patients with absent-to-moderate vs. advanced liver fibrosis according to CLD etiology.**

| Characteristics                                | Viral CLD (n=173)                   |                          | P      | NAFLD (n=107)                      |                          | P      |
|------------------------------------------------|-------------------------------------|--------------------------|--------|------------------------------------|--------------------------|--------|
|                                                | Absent-to-moderate fibrosis (n=149) | Advanced fibrosis (n=24) |        | Absent-to-moderate fibrosis (n=93) | Advanced fibrosis (n=14) |        |
| <b>Biometrics</b>                              |                                     |                          |        |                                    |                          |        |
| Age (years)                                    | 46.5±11.4                           | 54.8±7.6                 | <0.001 | 46.1±11.6                          | 58.0±8.5                 | <0.001 |
| Sex M/F (n, %)                                 | 93/56 (62/38)                       | 15/9 (63/37)             | 1.000  | 66/27 (71/29)                      | 11/3 (79/21)             | 0.753  |
| WC (cm)                                        | 91.2±9.9                            | 89.9±10.5                | 0.688  | 100.3±10.7                         | 111.1±15.2               | 0.021  |
| Hypertension (n, %)                            | 35 (24)                             | 9 (37)                   | 0.205  | 28 (30)                            | 10 (71)                  | 0.005  |
| BMI (kg/m <sup>2</sup> )                       | 25.9±3.9                            | 26.6±3.9                 | 0.452  | 29.1±4.4                           | 32.0±4.9                 | 0.025  |
| Type 2 diabetes (n, %)                         | 9 (6)                               | 4 (17)                   | 0.086  | 21 (23)                            | 12 (86)                  | <0.001 |
| MetS (n, %)                                    | 18 (12)                             | 3 (12)                   | 1.000  | 45 (48)                            | 11 (79)                  | 0.045  |
| <b>CVR scores</b>                              |                                     |                          |        |                                    |                          |        |
| SCORE                                          | 0.3 (0.6÷1.2)                       | 1.0 (0.5÷2.8)            | 0.002  | 0.4 (0.1÷1.4)                      | 2.2 (1.2÷3.3)            | <0.001 |
| FRS                                            | 6.4 (3.2÷12.6)                      | 11.4 (5.0÷18.0)          | 0.009  | 7.3 (3.4÷15.0)                     | 27.8 (14.7÷45.5)         | <0.001 |
| Progetto CUORE                                 | 1.5 (0.5÷4.0)                       | 2.6 (1.0÷5.7)            | 0.152  | 2.0 (0.9÷4.5)                      | 9.4 (5.1÷17.7)           | <0.001 |
| <b>Laboratory</b>                              |                                     |                          |        |                                    |                          |        |
| Platelets (x10 <sup>3</sup> /mm <sup>3</sup> ) | 216.1±56.3                          | 144.8±56.5               | <0.001 | 231.3±53.9                         | 167.6±71.8               | <0.001 |
| Glucose (mg/dL)                                | 93.0 (84.0÷100.0)                   | 94.0 (88.0÷112.0)        | 0.242  | 96.0 (89.0÷108.5)                  | 132.0 (101.8÷191.8)      | <0.001 |
| Insulin (mIU/L)                                | 9.7 (7.1÷15.9)                      | 8.7 (6.8÷14.9)           | 0.719  | 11.5 (7.8÷15.4)                    | 13.7 (8.7÷27.1)          | 0.150  |
| HOMA-IR score                                  | 2.4 (1.5÷3.6)                       | 2.3 (1.5÷4.8)            | 0.632  | 2.7 (1.7÷4.1)                      | 4.1 (2.1÷12.2)           | 0.024  |
| AST (U/L)                                      | 40.5 (30.5÷60.0)                    | 73.1 (55.0÷93.3)         | <0.001 | 31.0 (25.0÷42.0)                   | 50.2 (45.0÷56.3)         | <0.001 |
| ALT (U/L)                                      | 64.0 (42.0÷123.5)                   | 124.5 (75.8÷166.5)       | 0.006  | 58.0 (39.5÷94.0)                   | 75.0 (44.4÷92.0)         | 0.224  |
| GGT (U/L)                                      | 37.0 (22.5÷54.0)                    | 72.4 (42.3÷136.3)        | <0.001 | 48.0 (31.0÷96.5)                   | 71.5 (47.8÷154.0)        | 0.023  |
| Albumin (g/dL)                                 | 4.4±0.4                             | 4.2±0.4                  | 0.015  | 4.5±0.43                           | 4.2±0.52                 | 0.030  |
| γ-globulin (mg/dL)                             | 1.34±0.37                           | 1.55±0.44                | 0.014  | 1.06±0.24                          | 1.09±0.37                | 0.816  |
| TC (mg/dL)                                     | 173.9±38.9                          | 158.9±25.5               | 0.019  | 215.4±42.9                         | 180.1±48.6               | 0.006  |
| HDL-C (mg/dL)                                  | 47.4±14.1                           | 55.8±12.6                | 0.061  | 45.3±13.8                          | 38.9±10.5                | 0.096  |
| LDL-C (mg/dL)                                  | 103.0±32.7                          | 96.0±31.8                | 0.519  | 139.1±38.2                         | 109.6±37.1               | 0.010  |
| TG (mg/dL)                                     | 81.0 (62.0÷109.5)                   | 93.0 (63.0÷123.0)        | 0.356  | 145.0 (89.0÷234.3)                 | 146.0 (119.0÷215.0)      | 0.815  |
| SUA (mg/dL)                                    | 4.8±1.2                             | 4.9±1.4                  | 0.778  | 6.1±1.5                            | 5.5±1.4                  | 0.182  |
| Ferritin (mg/dL)                               | 122.5 (62.0÷232.0)                  | 184.0 (114.0÷384.0)      | 0.065  | 178.0(100.8÷247.8)                 | 193.0 (85.8÷392.5)       | 0.561  |
| <b>Liver fibrosis biomarkers</b>               |                                     |                          |        |                                    |                          |        |
| AST/ALT AAR                                    | 0.64 (0.51÷0.74)                    | 0.68 (0.55÷0.76)         | 0.357  | 0.56 (0.45÷0.67)                   | 0.59 (0.51÷0.99)         | 0.054  |
| APRI                                           | 0.59 (0.39÷0.89)                    | 1.52 (1.17÷1.88)         | <0.001 | 0.41 (0.29÷0.63)                   | 0.85 (0.65÷1.20)         | <0.001 |
| Fib4                                           | 1.07 (0.77÷1.60)                    | 2.58 (2.13÷3.54)         | <0.001 | 0.74 (0.61÷1.10)                   | 2.19 (1.31÷3.73)         | <0.001 |
| Forns                                          | 4.7±1.5                             | 7.5±1.6                  | <0.001 | 4.1±1.4                            | 7.1±1.8                  | <0.001 |
| NFS                                            |                                     |                          |        | -2.08±1.40                         | 0.43±1.62                | <0.001 |
| BARD                                           |                                     |                          |        | 1 (0÷1)                            | 2 (2÷4)                  | 0.001  |
| HFS                                            |                                     |                          |        | 0.04 (0.01÷0.07)                   | 0.34 (0.19÷0.70)         | <0.001 |

Data are expressed as means (±SD) for continuous variables normally distributed or as medians (25th–75th percentile) for those not normally distributed, and as frequencies (percentages) for categorical variables.

**Abbreviations:** AAR, AST to ALT ratio; ALT, alanine aminotransferase; APRI, AST to Platelet Ratio Index; AST, aspartate aminotransferase; BARD, BMI AAR Diabetes; BMI, body mass index; CVR, cardiovascular risk; F, female; FIB-4, fibrosis-4; FRS, Framingham risk score; GGT, gamma-glutamyl transferase; HDL-C, high density lipoprotein cholesterol; HFS, Hepamet fibrosis score; HOMA-IR, homeostasis model assessment of insulin resistance; LDL-C, low density lipoprotein cholesterol; M, male; MetS, metabolic syndrome; NFS, NAFLD fibrosis score; SUA, serum uric acid; TC, total cholesterol; TG, triglycerides; WC, waist circumference.

**Table S5. Characteristics of patients with simple steatosis vs. NASH in the NAFLD population.**

| Characteristics                                     | Simple steatosis<br>(n=30) | NASH<br>(n=77)      | P                |
|-----------------------------------------------------|----------------------------|---------------------|------------------|
| <b>Biometrics</b>                                   |                            |                     |                  |
| Age (years)                                         | 46.2±12.5                  | 48.2±11.8           | 0.446            |
| M/F ratio (n, %)                                    | 21/9 (70/30)               | 56/21 (73/27)       | 0.813            |
| BMI (kg/m <sup>2</sup> )                            | 26.9±3.5                   | 30.5±4.5            | <b>&lt;0.001</b> |
| WC (cm)                                             | 93.8±8.0                   | 104.7±11.8          | <b>&lt;0.001</b> |
| Hypertension (n, %)                                 | 6 (20)                     | 32 (42)             | <b>0.044</b>     |
| Type 2 diabetes (n, %)                              | 7 (23)                     | 26 (34)             | 0.356            |
| MetS (n, %)                                         | 8 (27)                     | 48 (62)             | <b>0.001</b>     |
| <b>CVR scores</b>                                   |                            |                     |                  |
| SCORE                                               | 0.6 (0.1÷1.3)              | 0.7 (0.2÷1.9)       | 0.433            |
| FRS                                                 | 6.5 (3.1÷12.1)             | 10.4 (4.1÷23.7)     | 0.057            |
| Progetto CUORE                                      | 1.8 (0.8÷3.6)              | 3.5 (1.1÷7.0)       | <b>0.016</b>     |
| <b>Laboratory</b>                                   |                            |                     |                  |
| Platelet count (x10 <sup>3</sup> /mm <sup>3</sup> ) | 230.0±50.5                 | 220.3±63.7          | 0.453            |
| Fasting glucose (mg/dL)                             | 95.5 (87.8÷110.5)          | 98.0 (91.5÷119.0)   | 0.179            |
| Fasting insulin (mIU/L)                             | 7.3 (5.2÷10.6)             | 13.0 (9.5÷17.8)     | <b>&lt;0.001</b> |
| HOMA-IR score                                       | 1.7 (1.3÷2.4)              | 3.4 (2.3÷4.7)       | <b>&lt;0.001</b> |
| AST (U/L)                                           | 27.9 (20.8÷35.3)           | 38.0 (27.0÷53.0)    | <b>0.002</b>     |
| ALT (U/L)                                           | 41.0 (35.0÷63.3)           | 65.0 (45.0÷106.0)   | <b>0.002</b>     |
| GGT (U/L)                                           | 48.0 (35.5÷101.3)          | 51.0 (31.5÷110.0)   | 0.920            |
| Albumin (g/dL)                                      | 4.6±0.4                    | 4.4±0.5             | 0.206            |
| γ-globulin (mg/dL)                                  | 1.1±0.3                    | 1.1±0.3             | 0.962            |
| TC (mg/dL)                                          | 221.0±45.3                 | 206.8±44.6          | 0.145            |
| HDL-C (mg/dL)                                       | 50.7±14.1                  | 42.1±12.5           | <b>0.004</b>     |
| LDL-C (mg/dL)                                       | 142.8±38.5                 | 132.4±39.2          | 0.243            |
| TG (mg/dL)                                          | 107.0 (78.8÷189.8)         | 153.0 (115.0÷237.0) | <b>0.035</b>     |
| SUA (mg/dL)                                         | 5.4±1.4                    | 6.3±1.4             | <b>0.004</b>     |
| Ferritin (mg/dL)                                    | 132.0 (86.0÷226.0)         | 195.0 (102.7÷319.5) | <b>0.062</b>     |
| <b>Liver histology</b>                              |                            |                     |                  |
| Significant fibrosis (n, %)                         | 2 (7)                      | 43 (56)             | <b>&lt;0.001</b> |
| Advanced fibrosis (n, %)                            | 0 (0)                      | 14 (18)             | <b>0.010</b>     |
| Cirrhosis (n, %)                                    | 0 (0)                      | 5 (6)               | 0.319            |
| <b>Liver fibrosis biomarkers</b>                    |                            |                     |                  |
| AAR                                                 | 0.59 (0.51÷0.70)           | 0.51 (0.43÷0.68)    | 0.106            |
| APRI                                                | 0.36 (0.23÷0.48)           | 0.51 (0.34÷0.72)    | <b>0.005</b>     |
| FIB-4                                               | 0.73 (0.58÷1.1)            | 0.91 (0.66÷1.42)    | 0.091            |
| Forns                                               | 4.1±1.6                    | 4.7±1.8             | 0.140            |
| NFS                                                 | -2.30±1.37                 | -1.54±1.72          | <b>0.033</b>     |
| BARD                                                | 1 (0÷1)                    | 1 (1÷2)             | <b>0.018</b>     |
| HFS                                                 | 0.02 (0.01÷0.07)           | 0.05 (0.02÷0.16)    | <b>0.008</b>     |

Data are expressed as means (±SD) for continuous variables normally distributed or as medians (25th–75th percentile) for those not normally distributed, and as frequencies (percentages) for categorical variables.

**Abbreviations:** AAR, AST to ALT ratio; ALT, alanine aminotransferase; APRI, AST to Platelet Ratio Index; AST, aspartate aminotransferase; BARD, BMI AAR Diabetes; BMI, body mass index; CVR, cardiovascular risk; F, female; FIB-4, fibrosis-4; FRS, Framingham risk score; GGT, gamma-glutamyl transferase; HDL-C, high density lipoprotein cholesterol; HFS, Hepamet fibrosis score; HOMA-IR, homeostasis model assessment of insulin resistance; LDL-C, low density lipoprotein cholesterol; M, male; MetS, metabolic syndrome; NFS, NAFLD fibrosis score; NASH, nonalcoholic steatohepatitis; SUA, serum uric acid; TC, total cholesterol; TG, triglycerides; WC, waist circumference.

**Table S6. Diagnostic performance of liver fibrosis biomarkers for predicting significant liver fibrosis in the whole population (n=280).**

|              | <b>Cut-offs</b> | <b>SE</b> | <b>SP</b> | <b>PPV</b> | <b>NPV</b> | <b>ACC</b> | <b>LR+</b> | <b>LR-</b> | <b>AUROC (95%CI)</b> |
|--------------|-----------------|-----------|-----------|------------|------------|------------|------------|------------|----------------------|
| <b>AAR</b>   | ≥ 0.8           | 15.0      | 81.7      | 31.3       | 63.4       | 57.9       | 0.82       | 1.04       | 0.44 (0.40-0.51)     |
|              | > 1             | 9.0       | 93.9      | 45.0       | 65.0       | 63.6       | 1.47       | 0.97       |                      |
| <b>APRI</b>  | > 0.5           | 72.0      | 51.7      | 45.3       | 76.9       | 58.9       | 1.49       | 0.54       | 0.68 (0.62- 0.75)    |
|              | > 0.7           | 50.0      | 70.6      | 48.5       | 71.8       | 63.2       | 1.70       | 0.71       |                      |
|              | > 1.5           | 19.0      | 94.4      | 65.5       | 67.7       | 67.5       | 3.42       | 0.86       |                      |
| <b>Fib-4</b> | ≥ 1.45          | 48.0      | 75.0      | 51.6       | 72.2       | 65.4       | 1.92       | 0.69       | 0.66 (0.59-0.73)     |
|              | > 3.25          | 18.0      | 97.8      | 81.8       | 68.2       | 69.3       | 8.10       | 0.84       |                      |
| <b>Forns</b> | ≥ 4.2           | 78.0      | 47.2      | 45.1       | 79.4       | 58.2       | 1.48       | 0.47       | 0.69 (0.63-0.76)     |
|              | > 6.9           | 29.0      | 95.6      | 78.4       | 70.8       | 71.8       | 6.53       | 0.74       |                      |

Significant fibrosis was defined as histologic liver fibrosis  $\geq$ F3 according to Ishak et al. [29] for viral CLD and  $\geq$ F2 according to Brunt/Kleiner et al. for NAFLD [27, 28].

*Abbreviations:* AAR, AST to ALT ratio; ACC, accuracy; ALT, alanine aminotransferase; APRI, AST to Platelet Ratio Index; AST, aspartate aminotransferase; AUROC, area under the receiver operating characteristics; CLD, chronic liver disease; Fib-4, fibrosis 4; LR, likelihood ratio; NPV, negative predictive value; PPV, positive predictive value; SE, sensitivity; SP, specificity.

**Table S7. Diagnostic performance of liver fibrosis biomarkers for predicting significant fibrosis in patients with viral CLD (n=173).**

|              | <b>Cut-offs</b> | <b>SE</b> | <b>SP</b> | <b>PPV</b> | <b>NPV</b> | <b>ACC</b> | <b>LR+</b> | <b>LR-</b> | <b>AUROC (95%CI)</b> |
|--------------|-----------------|-----------|-----------|------------|------------|------------|------------|------------|----------------------|
| <b>AAR</b>   | ≥ 0.8           | 14.6      | 79.7      | 25.0       | 66.7       | 59.0       | 0.72       | 1.07       | 0.48 (0.38-0.57)     |
|              | > 1             | 9.1       | 93.2      | 38.5       | 68.8       | 66.5       | 1.34       | 0.98       |                      |
| <b>APRI</b>  | > 0.5           | 83.6      | 42.4      | 40.4       | 84.8       | 55.5       | 1.45       | 0.39       | 0.73 (0.65-0.81)     |
|              | > 0.7           | 63.6      | 61.9      | 43.8       | 78.5       | 62.4       | 1.67       | 0.59       |                      |
|              | > 1.5           | 30.9      | 92.4      | 65.4       | 74.3       | 72.8       | 4.05       | 0.75       |                      |
| <b>FIB-4</b> | ≥1.45           | 60.0      | 68.6      | 47.1       | 78.6       | 65.9       | 1.91       | 0.58       | 0.73 (0.65-0.81)     |
|              | > 3.25          | 21.8      | 97.5      | 80.0       | 72.8       | 73.4       | 8.58       | 0.80       |                      |
| <b>Forns</b> | ≥ 4.2           | 89.1      | 42.4      | 41.9       | 89.3       | 57.2       | 1.55       | 0.26       | 0.77 (0.69-0.85)     |
|              | > 6.9           | 40.0      | 95.8      | 81.5       | 77.4       | 78.0       | 9.44       | 0.63       |                      |

Significant fibrosis was defined as histologic liver fibrosis ≥F3 according to Ishak et al. [29].

*Abbreviations:* AAR, AST to ALT ratio; ACC, accuracy; ALT, alanine aminotransferase; AST, aspartate aminotransferase; APRI, ALT to Platelet Ratio Index; AUROC, area under the receiver operating characteristics; CLD, chronic liver disease; FIB-4, fibrosis 4; LR, likelihood ratio; NPV, negative predictive value; PPV, positive predictive value; SE, sensitivity; SP, specificity.



**Table S8. Diagnostic performance of liver fibrosis biomarkers for predicting significant fibrosis in patients with NAFLD (n=107).**

|              | <b>Cut-offs</b> | <b>SE</b> | <b>SP</b> | <b>PPV</b> | <b>NPV</b> | <b>ACC</b> | <b>LR+</b> | <b>LR-</b> | <b>AUROC (95% CI)</b> |
|--------------|-----------------|-----------|-----------|------------|------------|------------|------------|------------|-----------------------|
| <b>AAR</b>   | ≥ 0.8           | 15.6      | 85.5      | 43.8       | 58.2       | 56.1       | 1.07       | 0.99       | 0.39 (0.28-0.51)      |
|              | > 1             | 8.9       | 95.2      | 57.1       | 59.0       | 58.9       | 1.84       | 0.96       |                       |
| <b>APRI</b>  | > 0.5           | 57.8      | 69.4      | 57.8       | 69.4       | 64.5       | 1.89       | 0.61       | 0.69 (0.59-0.80)      |
|              | > 0.7           | 33.3      | 87.1      | 65.2       | 64.3       | 64.5       | 2.58       | 0.77       |                       |
|              | > 1.5           | 4.4       | 98.4      | 66.7       | 58.7       | 58.9       | 2.76       | 0.97       |                       |
| <b>FIB-4</b> | ≥ 1.3           | 37.8      | 85.5      | 65.4       | 65.4       | 65.4       | 2.60       | 0.73       | 0.61 (0.49-0.72)      |
|              | > 2.67          | 13.3      | 96.8      | 75.0       | 60.6       | 61.7       | 4.13       | 0.90       |                       |
|              | ≥1.45           | 33.3      | 87.1      | 65.2       | 64.3       | 64.5       | 2.58       | 0.77       |                       |
|              | > 3.25          | 13.3      | 98.4      | 85.7       | 61.0       | 62.6       | 8.27       | 0.88       |                       |
| <b>Forns</b> | ≥ 4.2           | 64.4      | 56.5      | 51.8       | 68.6       | 59.8       | 1.48       | 0.63       | 0.62 (0.52-0.73)      |
|              | > 6.9           | 15.6      | 95.2      | 70.0       | 60.8       | 61.7       | 3.21       | 0.89       |                       |
| <b>NFS</b>   | ≥ -1.455        | 53.3      | 66.1      | 53.3       | 66.1       | 60.8       | 1.58       | 0.71       | 0.61 (0.50-0.73)      |
|              | > 0.675         | 15.6      | 96.8      | 77.8       | 61.2       | 62.6       | 4.82       | 0.87       |                       |
| <b>BARD</b>  | ≥ 2             | 37.8      | 72.6      | 50.0       | 61.6       | 57.9       | 1.38       | 0.86       | 0.56 (0.45-0.67)      |
| <b>HFS</b>   | ≥ 0.12          | 31.1      | 88.7      | 66.7       | 64.0       | 64.5       | 2.76       | 0.78       | 0.63 (0.52-0.74)      |
|              | > 0.47          | 20.0      | 98.4      | 90.0       | 62.9       | 65.4       | 12.4       | 0.81       |                       |

Significant fibrosis was defined as histologic liver fibrosis ≥F2 according to Brunt/Kleiner et al. [27, 28].

*Abbreviations:* AAR, AST to ALT ratio; ACC, accuracy; ALT, alanine aminotransferase; AST, aspartate aminotransferase; APRI, ALT to Platelet Ratio Index; AUROC, area under the receiver operating characteristics; BARD, BMI AAR Diabetes; CLD, chronic liver disease; FIB-4, fibrosis-4; HFS, Hepamet fibrosis score; LR, likelihood ratio; NFS, NAFLD fibrosis score; NPV, negative predictive value; PPV, positive predictive value; SE, sensitivity; SP, specificity.

## B. Supplementary Figures.

**Figure S1. Diagnostic performance of serum biomarkers for predicting significant fibrosis in all patients.**

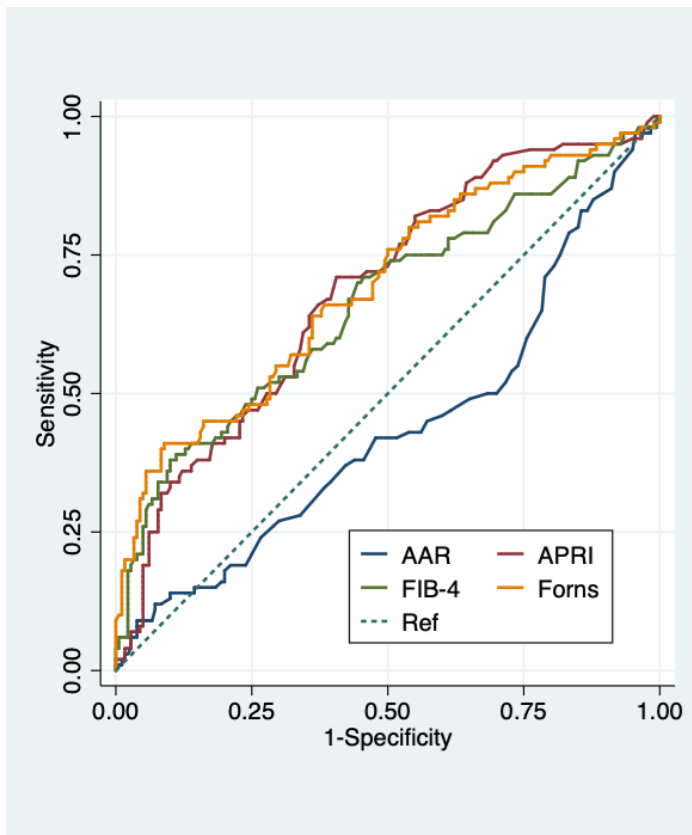

Receiver operating characteristic (ROC) curves of serum biomarkers for the diagnosis of significant fibrosis in all patients. AUROC (95% CI): 0.44 (0.40-0.51) for AAR, 0.68 (0.62- 0.75) for APRI, 0.66 (0.59-0.73) for Fib-4, 0.69 (0.63-0.76) for Forns index. Significant fibrosis was defined as histologic liver fibrosis  $\geq$ F3 according to Ishak et al. [29] for viral CLD, and  $\geq$ F2 according to Brunt/Kleiner et al. for NAFLD [27, 28].

AAR, AST to ALT ratio; APRI, AST to Platelet Ratio Index; Fib-4, fibrosis 4.

**Figure S2. Diagnostic performance of serum biomarkers for predicting significant fibrosis in viral CLD patients.**

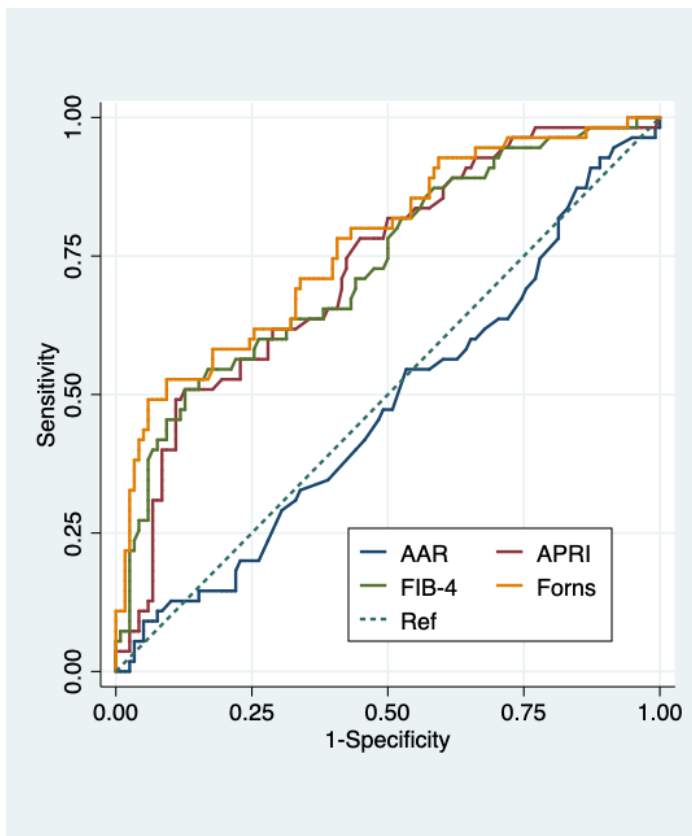

ROC curves of serum biomarkers for the diagnosis of significant fibrosis in viral CLD patients. AUROC (95% CI): 0.48 (0.38-0.57) for AAR, 0.73 (0.65-0.81) for APRI, 0.73 (0.65-0.81) for FIB-4, 0.77 (0.69-0.85) for Forns index. Significant fibrosis was defined as histologic liver fibrosis  $\geq$ F3 according to Ishak et al. [29].

AAR, AST to ALT ratio; APRI, AST to Platelet Ratio Index; Fib-4, fibrosis 4.

**Figure S3. Diagnostic performance of serum biomarkers for predicting significant fibrosis in NAFLD patients.**

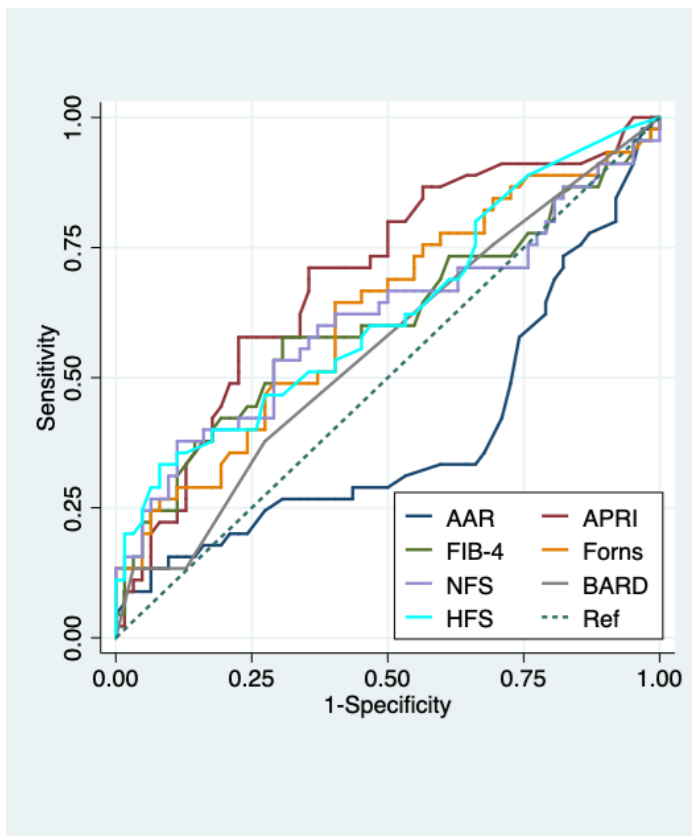

ROC curves of serum biomarkers for the diagnosis of significant fibrosis in NAFLD patients. AUROC (95% CI): 0.39 (0.28-0.51) for AAR, 0.69 (0.59-0.80) for APRI, 0.61 (0.49-0.72) for FIB-4, 0.62 (0.52-0.73) for Forns index, 0.61 (0.50-0.73) for NFS, 0.63 (0.52-0.74) for HFS, 0.56 (0.45-0.67) for BARD. Advanced fibrosis was defined as histologic liver fibrosis  $\geq$ F4 according to Ishak et al. [29] for viral CLD, and  $\geq$ F3 according to Brunt/Kleiner et al. for NAFLD [27, 28].

AAR, AST to ALT ratio; APRI, AST to Platelet Ratio Index; BARD, BMI AAR Diabetes; Fib-4, fibrosis 4; HFS, Hepamet fibrosis score; NFS, NAFLD fibrosis score.
